# Supplementary material for: Clinical Effectiveness of Lurasidone Monotherapy in Patients with Acute Episodes of Schizophrenia and Associated Symptoms of Depression
Source: PubMed Central journal article supplement — Consort Psychiatr. 2022 Sep 30;3(3):56–70. doi: 10.17816/CP172 (PMC11262118; doi:10.17816/cp172), 2022-09-30
Supplement: 2712-7672_2022_3_3_172_Appendix.pdf [file 2712-7672_2022_3_3_172_Appendix.pdf]

# Consortium PSYCHIATRICUM

## APPENDIX. SUPPLEMENTARY DATA TO:

Aleksandr Reznik, Timur Syunyakov, Inessa Akhmerova, Daniil Butylin, Anastasia Vasilenko, Anton Gvozdetskiy, Tagir Gizatullin, Galina Gilmanshina, Egor Golosov, Sergey Kolchev, Lidiya Linova, Daniil Miron, Aleksandr Mudrak, Igor Oleichik, Stepan Sizov, Elena Tarakanova, Olga Chesnokova.

Clinical Effectiveness of Lurasidone Monotherapy in Patients with Acute Episodes of Schizophrenia and Associated Symptoms of Depression.

Consortium Psychiatricum 2022; published online September 2022.

DOI: 10.17816/CP172.

This appendix is a part of the original submission.

The appendix is posted as it was supplied by the authors.

**Table S1. Incidence of adverse events in the study**

| <b>Adverse events</b>        | <b><i>n</i></b> | <b>%</b> |
|------------------------------|-----------------|----------|
| akathisia                    | 22              | 13%      |
| nausea                       | 19              | 11%      |
| tremor                       | 14              | 8%       |
| drowsiness                   | 12              | 7%       |
| headache                     | 11              | 7%       |
| sleep disorder               | 8               | 5%       |
| dizziness                    | 7               | 4%       |
| anxiety                      | 7               | 4%       |
| vomiting                     | 6               | 4%       |
| weakness                     | 4               | 2%       |
| dry mouth                    | 4               | 2%       |
| sweating                     | 3               | 2%       |
| anemia                       | 2               | 1%       |
| heartburn                    | 2               | 1%       |
| tachycardia                  | 2               | 1%       |
| abdominal pain               | 2               | 1%       |
| arousal                      | 2               | 1%       |
| weight gain                  | 2               | 1%       |
| hypersalivation              | 1               | 1%       |
| hypersedation                | 1               | 1%       |
| nausea, vomiting             | 1               | 1%       |
| muscle rigidity              | 1               | 1%       |
| pneumonia                    | 1               | 1%       |
| acute dystonia               | 1               | 1%       |
| nausea, abdominal discomfort | 1               | 1%       |
| fatigue                      | 1               | 1%       |
| hypokinesia                  | 1               | 1%       |
| seizures                     | 1               | 1%       |
| diarrhea                     | 1               | 1%       |
| indigestion                  | 1               | 1%       |
| acute dystonia               | 1               | 1%       |
| parkinsonism                 | 1               | 1%       |
| Total                        | 143             | 100%     |

**Table S2. Association of the frequency of types of adverse events with the weighted average daily dose**

| <b>AE type</b>     | <b>40-80 mg</b> | <b>80-120 mg</b> | <b>120-160 mg</b> | <b>Total</b>      |
|--------------------|-----------------|------------------|-------------------|-------------------|
| EPS                | 5 (71.4%)       | 16 (22.9%)       | 20 (30.3%)        | 41 (28.7%)        |
| General symptoms   | 0 (0%)          | 19 (27.1%)       | 15 (22.7%)        | 34 (23.8%)        |
| GI tract           | 0 (0%)          | 17 (24.3%)       | 16 (24.2%)        | 33 (23.1%)        |
| Stimulating effect | 0 (0%)          | 9 (12.9%)        | 8 (12.1%)         | 17 (11.9%)        |
| Autonomic AEs      | 1 (14.3%)       | 7 (10%)          | 2 (3%)            | 10 (7%)           |
| Hematological      | 0 (0%)          | 1 (1.4%)         | 1 (1.5%)          | 2 (1.4%)          |
| Sedation           | 0 (0%)          | 1 (1.4%)         | 1 (1.5%)          | 2 (1.4%)          |
| Metabolic          | 0 (0%)          | 0 (0%)           | 2 (3%)            | 2 (1.4%)          |
| Infectious disease | 1 (14.3%)       | 0 (0%)           | 0 (0%)            | 1 (0.7%)          |
| Seizures           | 0 (0%)          | 0 (0%)           | 1 (1.5%)          | 1 (0.7%)          |
| <b>Total</b>       | <b>7 (100%)</b> | <b>70 (100%)</b> | <b>66 (100%)</b>  | <b>143 (100%)</b> |
